EXPRESSION OF CONCERN

# Expression of Concern: The impact of digital economy on high-quality economic development: Research based on the consumption expansion

The *PLOS One* Editors

The *PLOS One* Editors issue an Expression of Concern for this article [1] to notify readers that the article cited in [1] as Reference 50 was retracted after [1] was published due to concerns about potential manipulation of the publication process.

In addition, the *PLOS One* Editors have concerns about the article's peer review.

## Reference

1. Li X, Wu Q. The impact of digital economy on high-quality economic development: Research based on the consumption expansion. PLoS One. 2023;18(12):e0292925. <https://doi.org/10.1371/journal.pone.0292925> PMID: [38100500](https://pubmed.ncbi.nlm.nih.gov/38100500/)

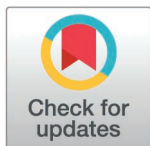

## OPEN ACCESS

**Citation:** The *PLOS One* Editors (2025) Expression of Concern: The impact of digital economy on high-quality economic development: Research based on the consumption expansion. PLoS One 20(9): e0331417. <https://doi.org/10.1371/journal.pone.0331417>

**Published:** September 2, 2025

**Copyright:** © 2025 The *PLOS One* Editors. This is an open access article distributed under the terms of the [Creative Commons Attribution License](https://creativecommons.org/licenses/by/4.0/), which permits unrestricted use, distribution, and reproduction in any medium, provided the original author and source are credited.
